# Supplementary material
Source: PubMed Central journal article supplement (PMC3227527)
Supplement: 253_2010_2741_MOESM6_ESM.pdf [file 253_2010_2741_MOESM6_ESM.pdf]

**Supplementary Figure S1: Proteome map of cytosolic proteins from cells grown at pH**

**5.7.** The numbers highlight the detected protein spots which were identified by MALDI-TOF analyses. Identified proteins are listed in supplementary data file SD2.

**Supplementary Figure S2: Proteome map of cytosolic proteins from cells grown at pH**

**4.5.** The numbers highlight the detected protein spots which were identified by MALDI-TOF analyses. Identified proteins are listed in supplementary data file SD3.

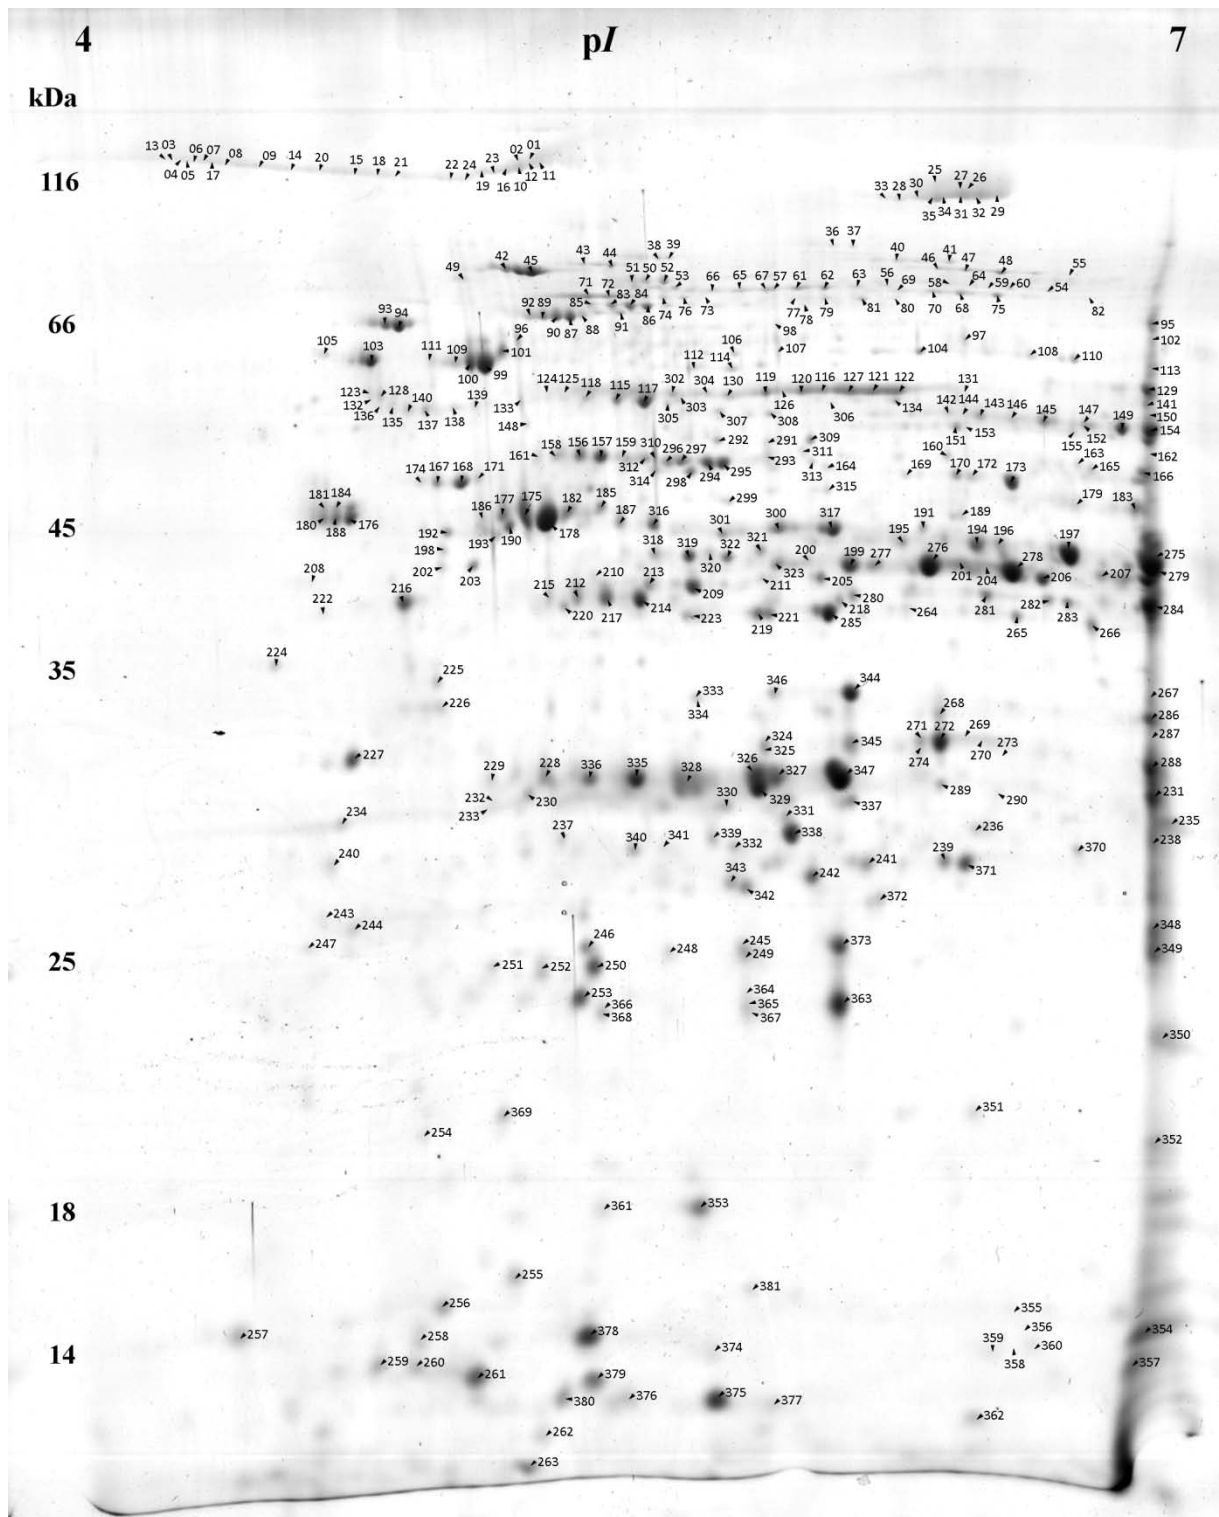

Supplementary Figure S1

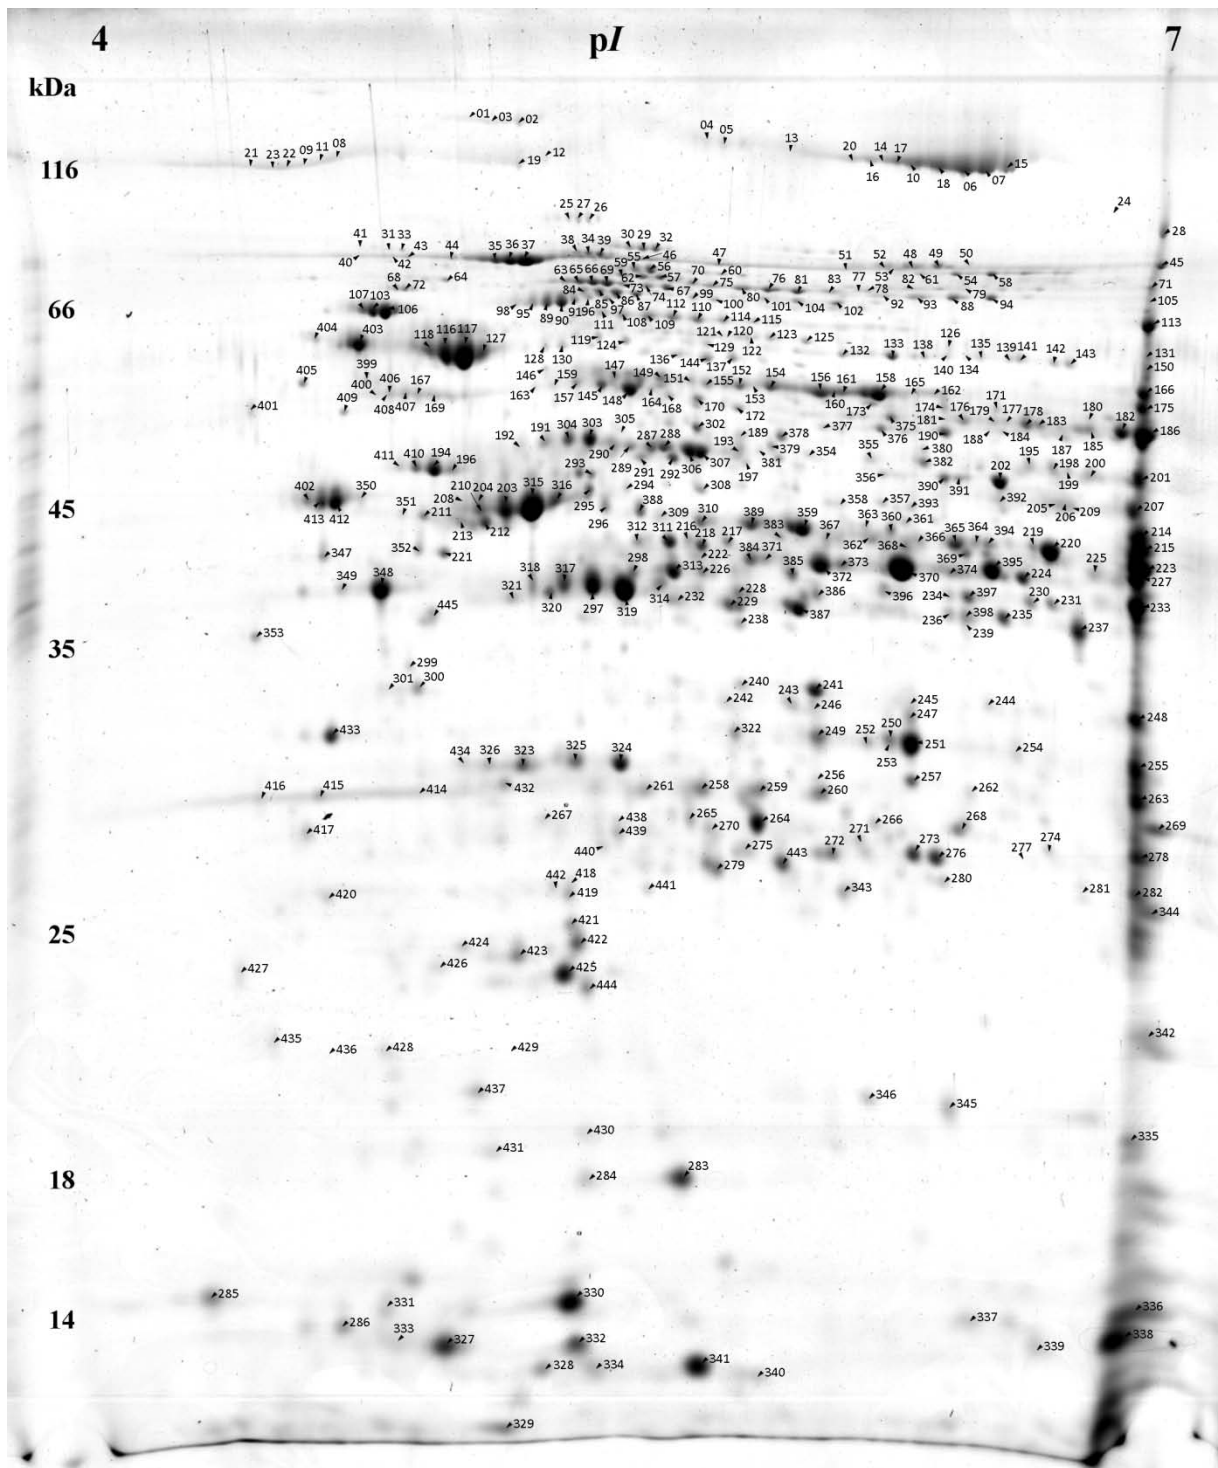

Supplementary Figure S2
