# Supplementary material
Source: PubMed Central journal article supplement (PMC3227527)
Supplement: 253_2010_2741_MOESM7_ESM.pdf [file 253_2010_2741_MOESM7_ESM.pdf]

1

2 **Supplementary Table S1:** Listed proteins are classified with regard to their function. Proteins with a factor3 > 1.0 (significant: factor  $\geq 2.0$ ) showed increased abundance in the acidogenesis (pH 5.7). Proteins with factor4 < 1.0 (significant: factor  $\leq 0.5$ ) showed increased abundance in the solventogenesis (pH 4.5).

5

| ORF                              | Protein name <sup>a</sup>                           | Spot # <sup>b</sup>                      | pH 5.7                                                                              | pH 4.5                                                                               | Ratio <sup>c,d</sup> |
|----------------------------------|-----------------------------------------------------|------------------------------------------|-------------------------------------------------------------------------------------|--------------------------------------------------------------------------------------|----------------------|
| <b><u>formation of acids</u></b> |                                                     |                                          |                                                                                     |                                                                                      |                      |
| CAC1742<br>( <i>pta</i> )        | Phosphate acetyl-<br>transferase                    | A 220<br>S 320,<br>321                   | 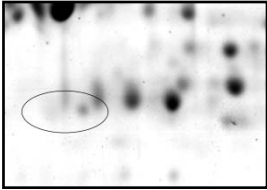   |    | ~ 0.6                |
|                                  |                                                     |                                          |    |    |                      |
| CAC1743<br>( <i>ack</i> )        | Acetate kinase                                      | A 179<br>S 206                           |  |  | ~ 0.9                |
|                                  |                                                     |                                          |  |  |                      |
| CAC2873<br>( <i>thl</i> )        | Acetyl-CoA acetyl-<br>transferase                   | A 275<br>S 227                           |  |  | ~1.3                 |
|                                  |                                                     |                                          |  |  |                      |
| CAC2708<br>( <i>hbd</i> )        | 3-hydroxy-butyryl-<br>CoA dehydrogenase             | A 272,<br>324, 345<br>S 249,<br>251, 322 |  |  | ~1.2                 |
|                                  |                                                     |                                          |  |  |                      |
| CAC2709<br>( <i>etfA</i> )       | Electron transfer<br>flavoprotein alpha-<br>subunit | A 219,<br>223, 285<br>S 229,<br>387      |  |  | ~1.2                 |
|                                  |                                                     |                                          |  |  |                      |
| CAC2710<br>( <i>etfB</i> )       | Electron transfer<br>flavoprotein beta-<br>subunit  | A 335,<br>336<br>S 324,<br>325           |  |  | ~ 2.1                |
|                                  |                                                     |                                          |  |  |                      |
| CAC2711<br>( <i>bcd</i> )        | Butyryl-CoA<br>dehydrogenase                        | A 194,<br>195, 197<br>S 220,<br>362, 365 |  |  | ~1.3                 |
|                                  |                                                     |                                          |  |  |                      |

|                           |                        |                                    |                                                                                    |      |
|---------------------------|------------------------|------------------------------------|------------------------------------------------------------------------------------|------|
| CAC2712<br>( <i>crt</i> ) | Enoyl-CoA<br>hydratase | A 338,<br>339<br><br>S 264,<br>265 | 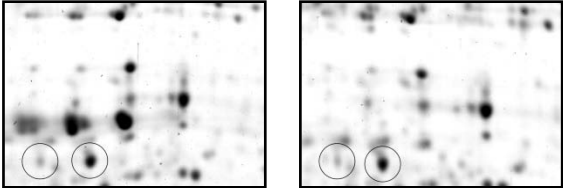 | ~1.1 |
| CAC3075<br>( <i>buk</i> ) | Butyrate kinase        | A 206<br><br>S 224                 |  | ~1.2 |

**formation of solvents**

|                              |                                                            |                    |                                                                                      |      |
|------------------------------|------------------------------------------------------------|--------------------|--------------------------------------------------------------------------------------|------|
| CA_P0162<br>( <i>adhe1</i> ) | Aldehyde<br>dehydrogenase<br>(NAD <sup>+</sup> )           | S 45               | 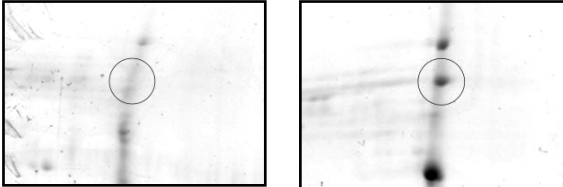   | ∞    |
| CA_P0163<br>( <i>ctfA</i> )  | Butyrate-<br>acetoacetate CoA-<br>transferase subunit<br>A | S 344              |   | ∞    |
| CA_P0164<br>( <i>ctfB</i> )  | Butyrate-<br>acetoacetate CoA-<br>transferase subunit<br>B | S 278              |  | ∞    |
| CA_P0165<br>( <i>adc</i> )   | Acetoacetate<br>decarboxylase                              | A 263<br><br>S 268 |  | ~0.8 |
| CAC3298<br>( <i>bdhB</i> )   | NADH-dependent<br>butanol<br>dehydrogenase B               | S 369              |  | ∞    |

1 <sup>a</sup>: Protein names according to NÖLLING et al. (2001).

2 <sup>b</sup>: The spot number indicated the proteins of the proteome map for the acidogenesis (A) at pH 5.7 (Fig. S1) or  
3 solventogenesis (S) at pH 4.5 (Fig. S2).

4 <sup>c</sup>: If more than one protein spot was detected, the average of all protein spots is shown (SD4).

1 <sup>d</sup>: The sign for nonterminating (⊖) indicates that the protein was not detectable under acidogenic conditions at  
 2 pH 5.7.

3  
 4

5 **Supplementary Table S2: Classification of genes with regard to their function.** Genes with an average fold  
 6 regulation > 1.0 (significant: average ≥ 3.0 and the values in at least in three out of four microarrays ≥ 2.0)  
 7 showed elevated transcript levels in acidogenesis (pH 5.7) or repressed transcript levels in the solventogenesis,  
 8 respectively. Genes with fold regulation < 1.0 (significant: average ≤ 0.33 and the values in at least three out of  
 9 four microarrays ≤ 0.5) showed elevated transcript levels in the solventogenesis (pH 4.5) or repressed transcript  
 10 levels in the acidogenesis (pH 5.7), respectively.

| ORF                              | Gene        | Protein function <sup>a</sup>                           | 1.<br>array | 2.<br>array | 3.<br>array | 4.<br>array | Average<br>fold reg. | SD  |
|----------------------------------|-------------|---------------------------------------------------------|-------------|-------------|-------------|-------------|----------------------|-----|
| <b><u>glycolysis</u></b>         |             |                                                         |             |             |             |             |                      |     |
| CAC2680                          | <i>pgi</i>  | Glucose-6-phosphate isomerase                           | 1.2         | 1.1         | 4.4         | 2.8         | <b>2.4</b>           | 1.5 |
| CAC0517                          | <i>pfkA</i> | 6-phosphofructokinase                                   | 1.1         | 1.0         | 1.7         | 1.1         | <b>1.2</b>           | 0.3 |
| CAC0827                          |             | Fructose-bisphosphate aldolase                          | 1.1         | 1.0         | 1.8         | 1.6         | <b>1.4</b>           | 0.4 |
| CAC3657                          |             | NADP-dependent glyceraldehyde-3-phosphate dehydrogenase | 0.6         | 0.5         | 1.3         | 0.7         | <b>0.8</b>           | 0.3 |
| CAC0709                          | <i>gapC</i> | Glyceraldehyde 3-phosphate dehydrogenase                | 1.0         | 0.9         | 1.9         | 1.9         | <b>1.4</b>           | 0.5 |
| CAC0710                          | <i>pgk</i>  | Phosphoglycerate kinase                                 | 1.5         | 1.4         | 2.5         | 1.8         | <b>1.8</b>           | 0.5 |
| CAC0711                          | <i>tpi</i>  | Triosephosphate isomerase                               | 1.2         | 0.8         | 3.4         | 1.7         | <b>1.8</b>           | 1.1 |
| CAC0712                          | <i>pgm</i>  | Phosphoglyceromutase                                    | 0.7         | 0.7         | 2.9         | 1.7         | <b>1.5</b>           | 1.1 |
| CAC0713                          | <i>eno</i>  | Phosphopyruvate hydratase                               | 0.9         | 0.8         | 2.8         | 1.6         | <b>1.5</b>           | 0.9 |
| CAC0518                          | <i>pykA</i> | Pyruvate kinase                                         | 1.8         | 1.1         | 4.4         | 1.8         | <b>2.3</b>           | 1.5 |
| CAC1036                          | <i>pykA</i> | Pyruvate kinase                                         | 1.6         | 1.3         | 3.4         | 1.8         | <b>2.0</b>           | 0.9 |
| CAC0028                          | <i>hydA</i> | Hydrogene dehydrogenase                                 | 1.6         | 1.4         | 2.2         | 1.7         | <b>1.7</b>           | 0.4 |
| <b><u>formation of acids</u></b> |             |                                                         |             |             |             |             |                      |     |
| CAC1742                          | <i>pta</i>  | Phosphate acetyltransferase                             | 0.8         | 0.8         | 1.2         | 1.0         | <b>0.9</b>           | 0.2 |
| CAC1743                          | <i>ack</i>  | Acetate kinase                                          | 0.9         | 0.8         | 1.0         | 0.9         | <b>0.9</b>           | 0.1 |
| CAC2873                          | <i>thlA</i> | Acetyl-CoA acetyltransferase                            | 2.3         | 1.7         | 8.1         | 3.5         | <b>3.9</b>           | 2.9 |
| CAC2708                          | <i>hbd</i>  | 3-hydroxybutyryl-CoA dehydrogenase                      | 1.9         | 1.5         | 3.3         | 3.3         | <b>2.5</b>           | 0.9 |

|         |             |                                              |     |     |     |     |             |     |
|---------|-------------|----------------------------------------------|-----|-----|-----|-----|-------------|-----|
| CAC2709 | <i>etfA</i> | Electron transfer flavoprotein alpha-subunit | 2.3 | 2.0 | 5.4 | 2.4 | <b>3.0</b>  | 1.6 |
| CAC2710 | <i>etfB</i> | Electron transfer flavoprotein beta-subunit  | 1.9 | 1.6 | 6.6 | 2.4 | <b>3.1*</b> | 2.4 |
| CAC2711 | <i>bcd</i>  | Butyryl-CoA dehydrogenase                    | 2.0 | 1.8 | 6.1 | 2.4 | <b>3.1</b>  | 2.0 |
| CAC2712 | <i>crt</i>  | Enoyl-CoA hydratase                          | 2.1 | 1.8 | 7.2 | 2.9 | <b>3.5</b>  | 2.5 |
| CAC3075 | <i>buk</i>  | Butyrate kinase                              | 4.0 | 2.8 | 8.1 | 5.7 | <b>5.1</b>  | 2.3 |
| CAC3076 | <i>ptb</i>  | Phosphate butyryltransferase                 | 3.4 | 2.5 | 9.5 | 5.4 | <b>5.2</b>  | 3.1 |

### formation of solvents

|          |              |                                                 |       |       |       |       |              |       |
|----------|--------------|-------------------------------------------------|-------|-------|-------|-------|--------------|-------|
| CA_P0162 | <i>adhe1</i> | Aldehyde dehydrogenase (NAD <sup>+</sup> )      | 0.012 | 0.009 | 0.008 | 0.004 | <b>0.008</b> | 0.003 |
| CA_P0163 | <i>ctfA</i>  | Butyrate-acetoacetate CoA-transferase subunit A | 0.009 | 0.010 | 0.009 | 0.004 | <b>0.008</b> | 0.003 |
| CA_P0164 | <i>ctfB</i>  | Butyrate-acetoacetate CoA-transferase subunit B | 0.014 | 0.010 | 0.007 | 0.004 | <b>0.008</b> | 0.004 |
| CA_P0165 | <i>adc</i>   | Acetoacetate decarboxylase                      | 0.4   | 0.4   | 0.5   | 0.4   | <b>0.4</b>   | 0.1   |
| CAC3298  | <i>bdhB</i>  | NADH-dependent butanol dehydrogenase B          | 0.5   | 0.5   | 1.0   | 0.6   | <b>0.6</b>   | 0.2   |
| CAC3299  | <i>bdhA</i>  | NADH-dependent butanol dehydrogenase A          | 1.2   | 1.1   | 2.3   | 2.2   | <b>1.7</b>   | 0.6   |
| CA_P0035 | <i>adhe2</i> | Aldehyde-alcohol dehydrogenase                  | 2.9   | 3.4   | 2.9   | 2.3   | <b>2.9</b>   | 0.4   |
| CA_P0059 |              | Alcohol dehydrogenase                           | 1.0   | 0.9   | 0.9   | 1.0   | <b>1.0</b>   | 0.1   |
| CAC3392  |              | NADH-dependent butanol dehydrogenase            | 1.2   | 0.9   | 2.2   | 1.1   | <b>1.4</b>   | 0.6   |

### stress response

|         |              |                                          |     |     |     |     |            |     |
|---------|--------------|------------------------------------------|-----|-----|-----|-----|------------|-----|
| CAC1280 | <i>hrcA</i>  | Heat-inducible transcription repressor   | 0.7 | 0.5 | 1.4 | 0.7 | <b>0.8</b> | 0.4 |
| CAC1281 | <i>grpE</i>  | Molecular chaperone GrpE                 | 0.8 | 0.7 | 1.9 | 0.6 | <b>1.0</b> | 0.6 |
| CAC1282 | <i>dnaK</i>  | Molecular chaperone DnaK                 | 0.7 | 0.6 | 2.2 | 0.8 | <b>1.1</b> | 0.8 |
| CAC1283 | <i>dnaJ</i>  | Molecular chaperones DnaJ (HSP40 family) | 0.6 | 0.6 | 1.8 | 0.8 | <b>0.9</b> | 0.6 |
| CAC0456 | <i>lonA</i>  | ATP-dependent protease                   | 0.7 | 0.7 | 0.5 | 0.6 | <b>0.6</b> | 0.1 |
| CAC2637 | <i>lonA</i>  | ATP-dependent Lon protease               | 1.2 | 1.1 | 1.7 | 1.0 | <b>1.3</b> | 0.3 |
| CAC2703 | <i>groEL</i> | Chaperonin GroEL                         | 0.6 | 0.5 | 2.0 | 1.5 | <b>1.2</b> | 0.7 |
| CAC2704 | <i>groES</i> | Co-chaperonin GroES (HSP10 family)       | 0.7 | 0.4 | 3.5 | 1.0 | <b>1.4</b> | 1.4 |
| CAC3189 | <i>clpC</i>  | ATPase with chaperone activity           | 1.3 | 1.1 | 3.0 | 1.8 | <b>1.8</b> | 0.9 |
| CAC3190 |              | ATP guanido phosphotransferase           | 1.7 | 1.5 | 2.9 | 1.2 | <b>1.8</b> | 0.7 |
| CAC3191 | <i>yacH</i>  | Uncharacterized conserved protein        | 1.7 | 1.4 | 2.4 | 1.2 | <b>1.7</b> | 0.6 |
| CAC3192 | <i>ctsR</i>  | Transcriptional regulator                | 1.7 | 1.5 | 1.8 | 1.4 | <b>1.6</b> | 0.2 |

|                                                       |             |                                                            |     |     |     |     |            |      |
|-------------------------------------------------------|-------------|------------------------------------------------------------|-----|-----|-----|-----|------------|------|
| CAC0648                                               |             | Molecular chaperone, DnaJ family                           | 0.8 | 1.2 | 0.5 | 0.8 | <b>0.8</b> | 0.3  |
| CAC1412                                               | <i>cdrC</i> | Methyl methane sulfonate/mytomycin C/UV resistance protein | 2.5 | 2.5 | 2.2 | 1.5 | <b>2.2</b> | 0.5  |
| CAC1415                                               |             | TerC family protein, ortholog of stress response protein   | 1.7 | 2.0 | 0.9 | 1.2 | <b>1.5</b> | 0.5  |
| CAC1716                                               |             | Uncharacterized stress-induced protein, YicC family        | 1.1 | 1.0 | 3.3 | 1.3 | <b>1.7</b> | 1.1  |
| CAC3315                                               | <i>htpG</i> | Heat shock protein 90                                      | 1.3 | 1.0 | 5.7 | 2.4 | <b>2.6</b> | 2.1  |
| CAC3714                                               |             | Molecular chaperone (small heat shock protein) HSP18       | 0.5 | 0.4 | 0.6 | 0.6 | <b>0.5</b> | 0.1  |
| <b><u>formation of branched chain amino acids</u></b> |             |                                                            |     |     |     |     |            |      |
| CAC0091                                               | <i>ilvC</i> | Ketol-acid reductoisomerase                                | 0.4 | 0.3 | 1.4 | 0.9 | <b>0.7</b> | 0.5  |
| CAC1479                                               | <i>ilvE</i> | Branched-chain amino acid aminotransferase                 | 0.8 | 0.8 | 1.3 | 1.1 | <b>1.0</b> | 0.2  |
| CAC3169                                               | <i>ilvB</i> | Acetolactate synthase large subunit                        | 0.6 | 0.7 | 0.7 | 0.5 | <b>0.6</b> | 0.1  |
| CAC3170                                               | <i>ilvD</i> | Dihydroxy-acid dehydratase                                 | 0.5 | 0.6 | 0.7 | 0.5 | <b>0.6</b> | 0.1  |
| CAC3171                                               | <i>leuB</i> | Isopropylmalate dehydrogenase                              | 0.5 | 0.6 | 0.6 | 0.6 | <b>0.6</b> | 0.02 |
| CAC3172                                               | <i>leuD</i> | 3-isopropylmalate dehydratase, small subunit               | 0.5 | 0.5 | 0.7 | 0.6 | <b>0.6</b> | 0.1  |
| CAC3173                                               | <i>leuC</i> | 3-isopropylmalate dehydratase                              | 0.5 | 0.5 | 0.8 | 0.6 | <b>0.6</b> | 0.1  |
| CAC3174                                               | <i>leuA</i> | 2-isopropylmalate synthase                                 | 0.6 | 0.5 | 1.2 | 0.8 | <b>0.8</b> | 0.3  |
| CAC3175                                               |             | Hypothetical protein                                       | 0.6 | 0.5 | 0.6 | 0.4 | <b>0.5</b> | 0.1  |
| CAC3176                                               | <i>ilvN</i> | Acetolactate synthase. small subunit                       | 0.4 | 0.3 | 0.7 | 0.4 | <b>0.4</b> | 0.2  |

1 <sup>a</sup>: Protein names according to NÖLLING et al. (2001).

2 \*: The average of the fold regulation was higher than three, but three of four microarrays were not 2-fold  
3 upregulated. That means these genes were not significant upregulated in the acidogenesis.

4

5

6
